# Supplementary material
Source: publisher site journal article supplement (https://www.dovepress.com/article/480086)
Supplement: Supplementary file 1 [file get_supplementary_file.php]

**Supplementary material: Figures S1–S2; Tables S1 – S7**

**Figure S1.** Dose-response profiles of the relationships between SARS-CoV-2 doses (PFU mL-1) and cycle threshold (*C*t) values for (**A**) Alpha, (**B**) Beta, (**C**) Gamma, (**D**) Delta, and (**E**) Omicron variants.

**Figure S2.** Threshold of infectivity estimations of five VOC based on cumulative distribution functions (CDFs) of 10% decremental proportion of cycle threshold (*C*t) compared to 0.1 PFU mL-1 extracted from *ED*10 estimates for (**A**) Alpha, (**B**) Beta, (**C**) Gamma, (**D**) Delta, and (**E**) Omicron variants.

**Table S1** Estimates of basic reproduction numbers (*R*0s) of SARS-CoV-2 in different countries

**Table S2** Estimates of basic reproduction numbers (*R*0s) of the five variants of concern (VOC)

**Table S3** Experimental data of relationships between *C*t value (mean ± standard deviations (SD)) and plague-forming unit (PFU) adopted from Kogoj et al12

**Table S4** Epidemiological parameter estimates of SARS-CoV-2

**Table S5** Potential control measure combinations used in control measure model

**Table S6** Fitted coefficients (mean ± S.E.) of three-parameter Hill model describing decremental proportion of *C*t compared to 0.1 PFU mL-1 of SARS-CoV-2 variants

**Table S7** Fitted coefficients (Mean ± SE) of the three-parameter Weibull threshold model to data points adopted from the cumulative distribution functions (CDFs) of 10% decremental proportion of *C*t compared to 0.1 PFU mL-1


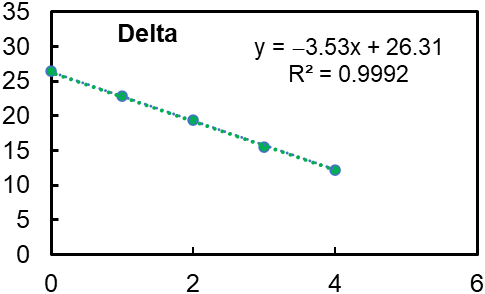

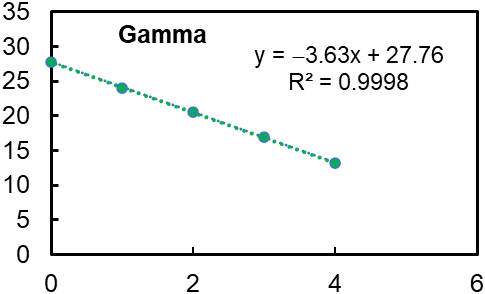

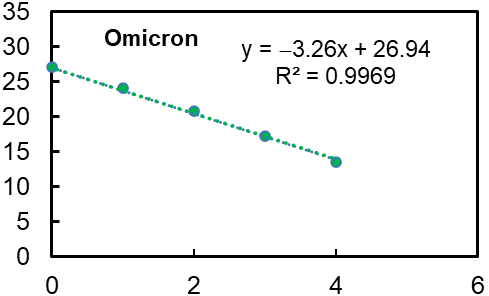


**Cycle threshold (*C*t) value**

**SARS-CoV-2 viral dose (log PFU mL-1)**

**A**

**B**

**C**

**D**

**E**

**Figure S1.** Dose-response profiles of the relationships between SARS-CoV-2 doses (PFU mL-1) and cycle threshold (*C*t) values for (**A**) Alpha, (**B**) Beta, (**C**) Gamma, (**D**) Delta, and (**E**) Omicron variants.

**B**

**Beta**

**Alpha**

**A**

**Cumulative distribution function**

**D**

**Delta**

**C**

**Gamma**

**Threshold of infectivity (PFU mL-1)**

**E**

**Omicron**

**Figure S2.** Threshold of infectivity estimations of five VOC based on cumulative distribution functions (CDFs) of 10% decremental proportion of cycle threshold (*C*t) compared to 0.1 PFU/mLextracted from *ED*10 estimates for (**A**) Alpha, (**B**) Beta, (**C**) Gamma, (**D**) Delta, and (**E**) Omicron variants.

**Table S1** Estimates of basic reproduction numbers (*R*0s) of SARS-CoV-2 in different countries

| Country | *R*0 estimate | Reference |
| --- | --- | --- |
| Belgium | 3.6 (2.9−4.6) a | Ke et al1 |
| France | 4.4 (3.6−5.4) a | Ke et al1 |
| Germany | 4.7 (3.8−5.8) a | Ke et al1 |
| Italy | 4.6 (3.7−5.8) a | Ke et al1 |
| Netherlands | 3.5 (3.0−4.2) a | Ke et al1 |
| Spain | 6.4 (5.2−8.0) a | Ke et al1 |
| Switzerland | 3.5 (2.8−4.3) a | Ke et al1 |
| United Kingdom | 3.9 (3.3−4.6) a | Ke et al1 |
| United States | 5.9 (4.7−7.5) a | Ke et al1 |
| Ghana | 5.91 (5.22−6.81) b | Iyaniwura et al2 |
| South Africa | 7.02 (6.43−7.76) b | Iyaniwura et al2 |
| Madagascar | 4.97 (4.22−6.01) b | Iyaniwura et al2 |
| Mauritius | 9.66 (8.15−11.75) b | Iyaniwura et al2 |
| China | 3.68 (3.20−4.22) a | Yu et al3 |
| China (Wuhan) | 4.47 (3.10−6.44) a | Yu et al3 |
| India | 1.64 (1.20−2.21) a | Yu et al3 |
| Australia | 2.07 (1.79–2.37) a | Spouge4 |
| Brazil | 4.34 (1.55−9.91) a | Yue et al4 |
| Canada | 2.74 (2.51–2.98) a | Spouge5 |
| Russia | 2.17 (1.32−3.41) a | Yue et al4 |
| Taiwan | 1.88 (0.34–6.24) a | Akhmetzhanov et al6, Chen et al7, Rahman et al8 |
| Peru | 4.12 (1.63−8.75) a | Yue et al4 |
| Egypt | 2.64 (0.79–6.76) a | Radwan9 |
| Colombia | 4.42 (1.67−9.68) a | Yue et al4 |
| Turkey | 5.99 (1.72−15.34) a | Yue et al4 |

a Median ± 95% confidence interval.

b Median ± 90% confidence interval.

**Table S2** Estimates of basic reproduction numbers (*R*0s) of the five variants of concern (VOC)

|  | Alpha  (B.1.1.7)b | Beta  (B.1.351)c | Gamma  (P.1)c | Delta (B.1.617.2)b | Omicron (B.1.1.529)d |
| --- | --- | --- | --- | --- | --- |
| Basic reproduction number a | 4.56 (2.68−6.43) | 3.45 (2.51−4.65) | 4.8 (4.74−4.86) | 5.94 (5.19−6.68) | 9.5  (5.5−24) |

a Mean (95% confidence interval).

b Du et al10

c de Souza et al11

d Liu and Rocklöv12

**Table S3** Experimental data of relationships between cycle threshold *C*t value (mean ± standard deviations (SD)) and plague-forming unit (PFU)

|  | 1×104  [PFU/mL] | 1×103  [PFU/mL] | 1×102  [PFU/mL] | 1×101  [PFU/mL] | 1×100  [PFU/mL] | 1×10-1  [PFU/mL] |
| --- | --- | --- | --- | --- | --- | --- |
| Alpha | 13.9 ± 1.3 | 17.3 ± 1.4 | 21.0 ± 1.6 | 24.5 ± 1.7 | 27.9 ± 1.6 | 31.2 ± 1.8 |
| Beta | 13.4 ± 1.2 | 17.2 ± 1.4 | 20.4 ± 1.3 | 23.9 ± 1.3 | 27.3 ± 1.3 | 30.7 ± 1.3 |
| Gamma | 13.2 ± 1.5 | 17.0 ± 1.0 | 20.5 ± 1.3 | 24.0 ± 1.1 | 27.7 ± 1.6 | 31.5 ± 1.7 |
| Delta | 12.2 ± 0.9 | 15.5 ± 1.1 | 19.4 ± 1.3 | 22.9 ± 1.4 | 26.5 ± 1.4 | 29.6 ± 1.5 |
| Omicron | 13.5 ± 1.4 | 17.2 ± 1.7 | 20.8 ± 1.7 | 24.0 ± 1.5 | 27.0 ± 1.8 | 29.8 ± 1.7 |

1. **Notes:** Adapted from Kogoj R, Korva M, Knap N, et al. Comparative evaluation of six SARS-CoV-2 real-time RT-PCR diagnostic approaches shows substantial genomic variant-dependent intra- and inter-test variability, poor interchangeability of cycle threshold and complementary turn-around times. *Pathogens*. 2022;11(4):462.13

**Table S4** Epidemiological parameter estimates of SARS-CoV-2

| Location of respiratory tract | Incubation period (days) | Latent period (days) | Mean duration of viral shedding (days) | Asymptomatic infectious proportion (*θ*) |
| --- | --- | --- | --- | --- |
| Upper | 6.9a  (95% CI: 6.3 – 7.5) | 5.5a  (95% CI: 5.1 – 5.9) | 17.0  (95% CI: 15.5 – 18.6)b | LN(0.08, 1.31)c  (95% CI: 0.04 – 0.13) |
| Lower | 14.6  (95% CI: 9.3 – 20.0)b | LN(0.09, 1.41)c  (95% CI: 0.04 – 0.18) |

a Adopted from Xin et al14 with mean (95% confidence interval (CI)).

b Adopted from Cevik et al15 with mean (95% CI).

c LN(gm, gsd) = Lognormal(geometric mean, geometric standard deviation).

**Table S5** Potential control measure combinations used in control measure model(C1: Social distancing, C2: Social distancing + masking, C3: Social distancing + masking + hand washing, C4: Vaccination + social distancing, C5: Vaccination + social distancing + masking, and C6: Vaccination + social distancing + masking + hand washing)

| Control measure combinations | | Coverage of intervention (%) | | | |
| --- | --- | --- | --- | --- | --- |
| Social distancing (*ε*2) c,d,e | Masking  (*ε*3) f,g,h | Hand washing  (*ε*4) i,j,k |
| Without pandemic vaccination | C1 | 72 (51−100) l | – | – | |
| C2 | 72 (51−100) | 61 (50−67) | – | |
| C3 | 72 (51−100) | 61 (50−67) | 40 (36−47) | |
| With pandemic vaccination (*ε*1) a,b  83 (60−95) | C4 | 72 (51−100) | – | – | |
| C5 | 72 (51−100) | 61 (50−67) | – | |
| C6 | 72 (51−100) | 61 (50−67) | 40 (36−47) | |

a Polack et al16

b Kim et al17

c Bielecki et al18

d Glogowsky et al19

e Sun et al20

f Dato et al21

g Andrejko et al22

h Riley et al23

i Beale et al24

j Ran et al25

k Xie et al26

l Mean (min−max).

**Table S6** Fitted coefficients (mean ± SE) of three-parameter Hill model describing decremental proportion of *C*t compared to 0.1 PFU mL-1 of SARS-CoV-2 variants

| Hill-based parameters | Alpha (B.1.1.7) | Beta  (B.1.351) | Gamma  (P.1) | Delta (B.1.617.2) | Omicron (B.1.1.529) |
| --- | --- | --- | --- | --- | --- |
| *E*max | 0.60 ± 0.12 | 0.60 ± 0.11 | 0.61 ± 0.12 | 0.60 ± 0.11 | 0.55 ± 0.11 |
| *ED*50  (PFU mL-1) | 274.90 ± 243.77 | 189.00 ± 154.24 | 193.90 ± 167.89 | 183.20 ± 144.73 | 272.65 ± 241.12 |
| *ED*10  (PFU mL-1) | 0.017 ± 0.027 | 0.011 ± 0.012 | 0.019 ± 0.023 | 0.007 ± 0.009 | 0.007 ± 0.012 |
| *n* | 1.00 ± 0.64 | 1.00 ± 0.65 | 1.00 ± 0.69 | 1.01 ± 0.65 | 1.00 ± 0.63 |
| *r*2 | 0.64 | 0.68 | 0.65 | 0.73 | 0.69 |
| *p*-value | * | ** | ** | ** | ** |

**p* < 0.05, ***p* < 0.01.

**Table S7** Fitted coefficients (Mean ± SE) of the three-parameter Weibull threshold model to data points adopted from the cumulative distribution functions (CDFs) of 10% decremental proportion of *C*t compared to 0.1 PFU mL-1

| Fitted coefficient | Variants of concern (VOC) | | | | |
| --- | --- | --- | --- | --- | --- |
| Alpha (B.1.1.7) | Beta  (B.1.351) | Gamma  (P.1) | Delta (B.1.617.2) | Omicron (B.1.1.529) |
| *α* | 0.013 ± 0.001*** | 0.009 ± 0.0004** | 0.016 ± 0.0009** | 0.006 ± 0.0004** | 0.005 ± 0.0004** |
| *β* | 0.780 ± 0.058** | 0.945 ± 0.056** | 0.898 ± 0.073** | 0.879 ± 0.074** | 0.754 ± 0.063** |
| *γ* (PFU mL-1) | 0.001 ± 9.534×10-5** | 0.001 ± 0.0001** | 0.002 ± 0.0002* | 0.001 ± 7.074×10-5** | 0.0003 ± 3.758×10-5** |
| *r*2 | 0.99 | 0.99 | 0.99 | 0.99 | 0.99 |
| *p* value | *** | *** | *** | *** | *** |

**p* < 0.05, ** *p* < 0.01, *** *p* < 0.001.

**References**

1. Ke R, Romero-Severson E, Sanche S, Hengartner N. Estimating the reproductive number *R*0 of SARS-CoV-2 in the United States and eight European countries and implications for vaccination. *J Theor Biol*. 2021;517:110621.
2. Iyaniwura SA, Rabiu M, David JF, Kong JD. The basic reproduction number of COVID-19 across Africa. *PLOS One*. 2022;17(2):e0264455.
3. Yu CJ, Wang ZX, Xu Y, et al. Assessment of basic reproductive number for COVID-19 at global level: A meta-analysis. *Medicine*. 2021;100(18):e25837.
4. Yue T, Fan B, Zhao Y, et al. Dynamics of the COVID-19 basic reproduction numbers in different countries. *Sci Bull*. 2021;66(3):229.
5. Spouge JL. A comprehensive estimation of country-level basic reproduction numbers *R*0 for COVID-19: Regime regression can automatically estimate the end of the exponential phase in epidemic data. *PLOS ONE*. 2021;16(7):e0254145.
6. Akhmetzhanov AR, Cheng HY, Linton NM, et al. Transmission dynamics and effectiveness of control measures during COVID-19 surge, Taiwan, April–August 2021. *Emerg Infect Dis*. 2022; 28(10):2051–2059.
7. Chen YC, Yang HP, Li HC, et al. Features and transmission dynamics of SARS-CoV-2 superspreading events in Taiwan: Implications for effective and sustainable community-centered control. *Pediatr Neonatol*. 2021; 62(4):437–440.
8. Rahman B, Aziz IA, Khdhr FW, Mahmood DFD. Preliminary estimation of the basic reproduction number of SARS-CoV-2 in the Middle East. *UKH J Sci Eng*. 2022;6(1):61–68.
9. Radwan GN. Epidemiology of SARS-CoV-2 in Egypt. *East Mediterr Health*. 2020;26(7):768–773.
10. Du ZW, Liu CF, Wang CY, et al. Reproduction numbers of SARS-CoV-2 variants: A systematic review and meta-analysis. *Clin Infect Dis*. 2022;75(1):e293–e295.
11. de Souza AS, de Freitas Amorim VM, Guardia GDA, et al. Severe acute respiratory syndrome coronavirus 2 variants of concern: A perspective for emerging more transmissible and vaccine-resistant strains. *Viruses*. 2022;14(4):827.
12. Liu Y, Rocklöv J. The effective reproductive number of the Omicron variant of SARS-CoV-2 is several times relative to Delta. *J Travel Med*. 2022;29(3):taac037.
13. Kogoj R, Korva M, Knap N, et al. Comparative evaluation of six SARS-CoV-2 real-time RT-PCR diagnostic approaches shows substantial genomic variant-dependent intra- and inter-test variability, poor interchangeability of cycle threshold and complementary turn-around times. *Pathogens*. 2022;11(4):462.
14. Xin H, Li Y, Wu P, et al. Estimating the latent period of coronavirus disease 2019 (COVID-19). *Clin Infect Dis*. 2022;74(9):1678–1681.
15. Cevik M, Tate M, Lloyd O, et al. SARS-CoV-2, SARS-CoV, and MERS-CoV viral load dynamics, duration of viral shedding, and infectiousness: A systematic review and meta-analysis. *Lancet Microbe*. 2021;2(1):e13–e22.
16. Polack FP, Thomas SJ, Kitchin N, et al. C4591001 Clinical Trial Group. Safety and efficacy of the BNT162b2 mRNA Covid-19 vaccine. *N Engl J Med*. 2020;383(27):2603-2615.
17. Kim JH, Marks F, Clemens JD. Looking beyond COVID-19 vaccine phase 3 trials. *Nat Med*. 2021; 27(2):205–211.
18. Bielecki M, Züst R, Siegrist D, et al. Social distancing alters the clinical course of COVID-19 in young adults: A comparative cohort study. *Clin Infect Dis*. 2021;72(4):598-603.
19. Glogowsky U, Hansen E, Schächtele S. How effective are social distancing policies? Evidence on the fight against COVID-19. *PLoS One*. 2021;16(9):e0257363.
20. Sun KS, Lau TSM, Yeoh EK, et al. Effectiveness of different types and levels of social distancing measures: a scoping review of global evidence from earlier stage of COVID-19 pandemic. *BMJ Open*. 2022;12(4):e053938.
21. Dato VM, Hostler D, Hahn ME. Simple respiratory mask. *Emerg Infect Dis*. 2006;12(6):1033-1034.
22. Andrejko KL, Pry JM, Myers JF, et al. California COVID-19 case-control study team. Effectiveness of face mask or respirator use in indoor public settings for prevention of SARS-CoV-2 infection - California, February-December 2021. *MMWR Morb Mortal Wkly Rep*. 2022; 71(6):212-216.
23. Riley J, Huntley JM, Miller JA, et al. Mask effectiveness for preventing secondary cases of COVID-19, Johnson County, Iowa, USA. *Emerg. Infect. Dis*. 2022;28(1):69-75.
24. Beale S, Johnson AM, Zambon M et al. Hand hygiene practices and the risk of human coronavirus infections in a UK Community cohort. *Wellcome Open Res*. 2021;5:98.
25. Ran L, Chen XY, Wang Y, et al. Risk factors of healthcare workers with coronavirus disease 2019: a retrospective cohort study in a designated hospital of Wuhan in China. *Clin Infect Dis*. 2020;71(16):2218-2221.
26. Xie W, Chen ZH, Wang Q, et al. Infection and disease spectrum in individuals with household exposure to SARS-CoV-2: A family cluster cohort study. *J Med Virol*. 2021;93(5):3033-3046.
